# Supplementary material
Source: PubMed Central journal article supplement (PMC2904140)

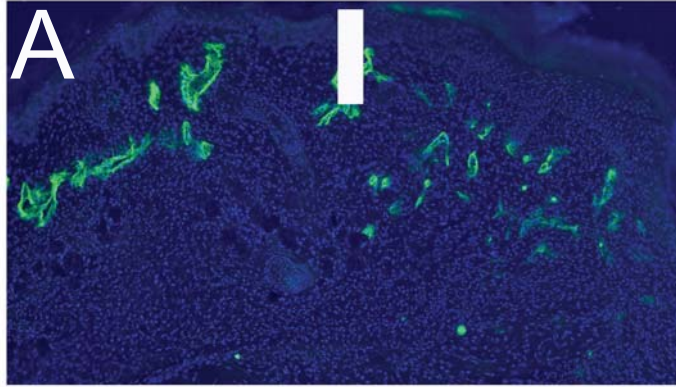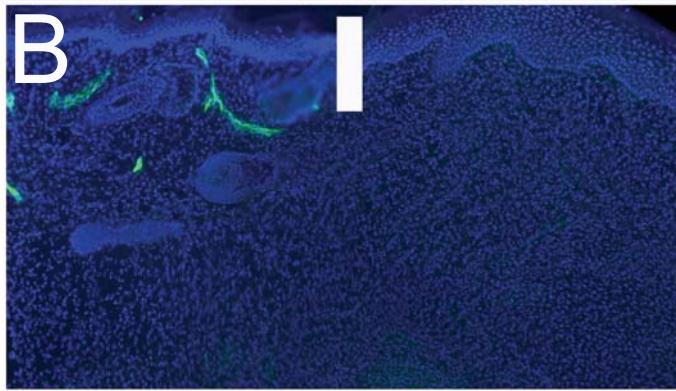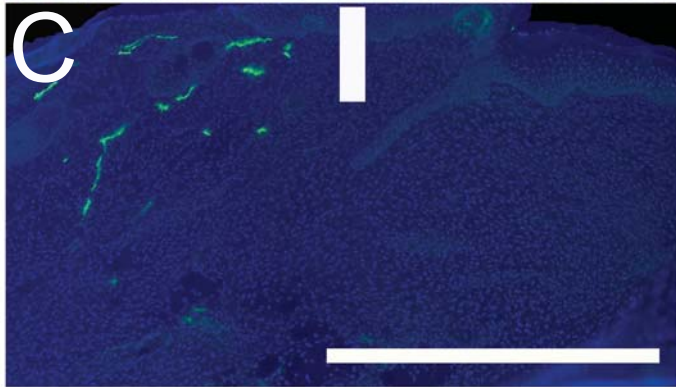

Supplement: 00008.2010v2_1.pdf [file 00008.2010v2_1.pdf]
